# Supplementary material for: The proto-oncogene SRC phosphorylates cGAS to inhibit an antitumor immune response
Source: JCI journal article supplement (doi:10.1172/jci.insight.167270), 2023-05-11
Supplement: sd1 [file 1]

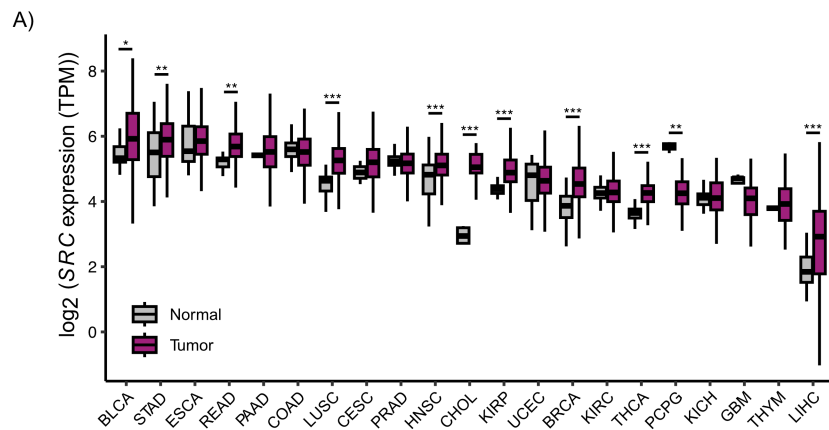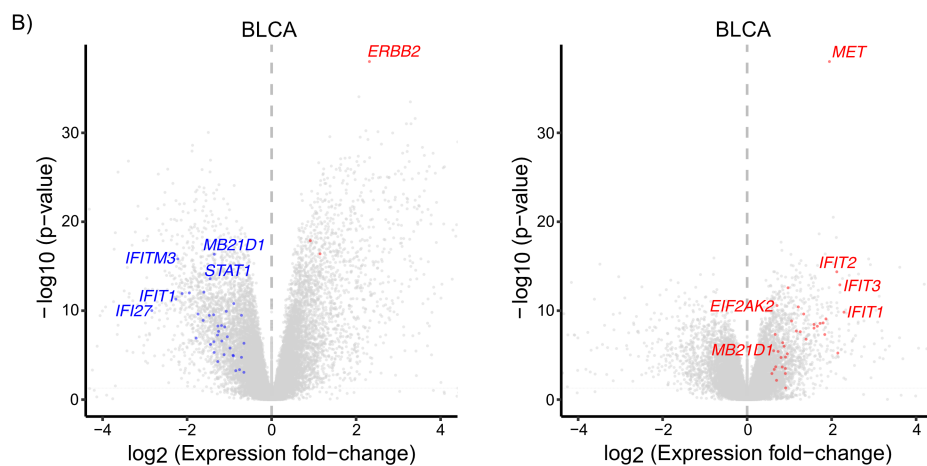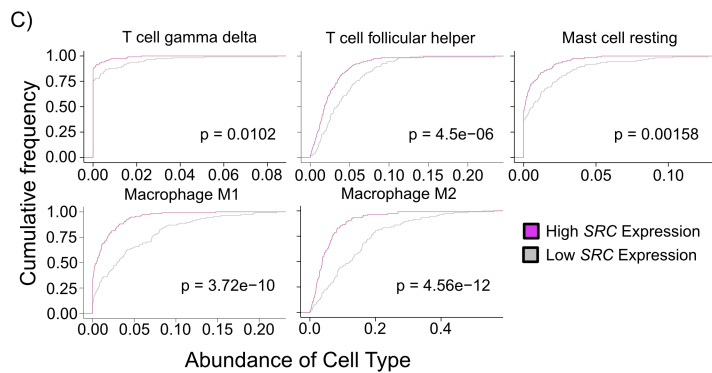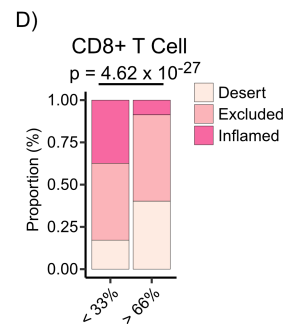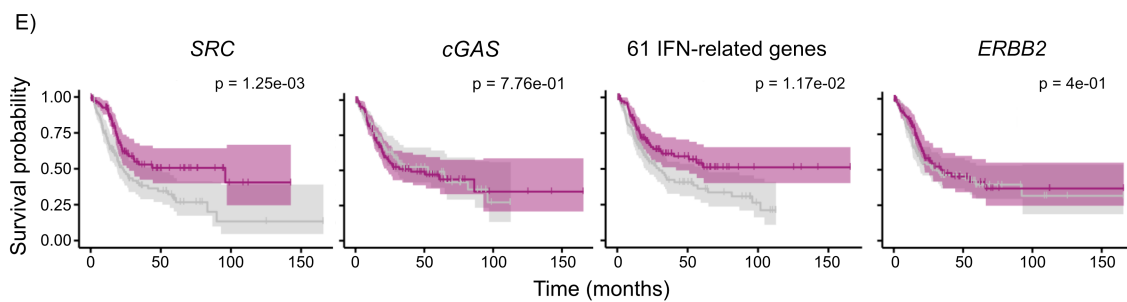

**Figure S1: *SRC* expression negatively correlates with immune response in bladder cancer.** (A) *SRC* expression in primary tumors and normal counterparts from TCGA. Expression levels depicted in transcripts per million (TPM). Statistical significance determined using two-sided Mann-Whitney U-test. (B) *ERBB2* and *MET* correlation volcano gene expression plots in primary BLCA. Colored dots represent Type I IFN genes with significant negative (blue) or positive (red) correlation. High (upper 66<sup>th</sup> percentile) versus low (lower 33<sup>rd</sup> percentile) oncogene expressing samples were used analyzed. (C) CIBERSORT analysis of immune cell abundance in BLCA tumors. High (upper 66<sup>th</sup> percentile) versus low (lower 33<sup>rd</sup> percentile) *SRC* expressing samples were analyzed. Statistical significance determined using two-sided Mann-Whitney U-test. (D) CD8+ T cell IHC staining in advanced urothelial cancer. High (upper 66<sup>th</sup> percentile) versus low (lower 33<sup>rd</sup> percentile) *SRC* expressing samples were analyzed. Statistical significance determined using multinomial proportion test. (E) Kaplan-Meier (KM) estimation of survival of BLCA patients and correlation with *SRC*, *cGAS*, *ERBB2*, and IFN-related genes. p-value estimation from the log-rank test,

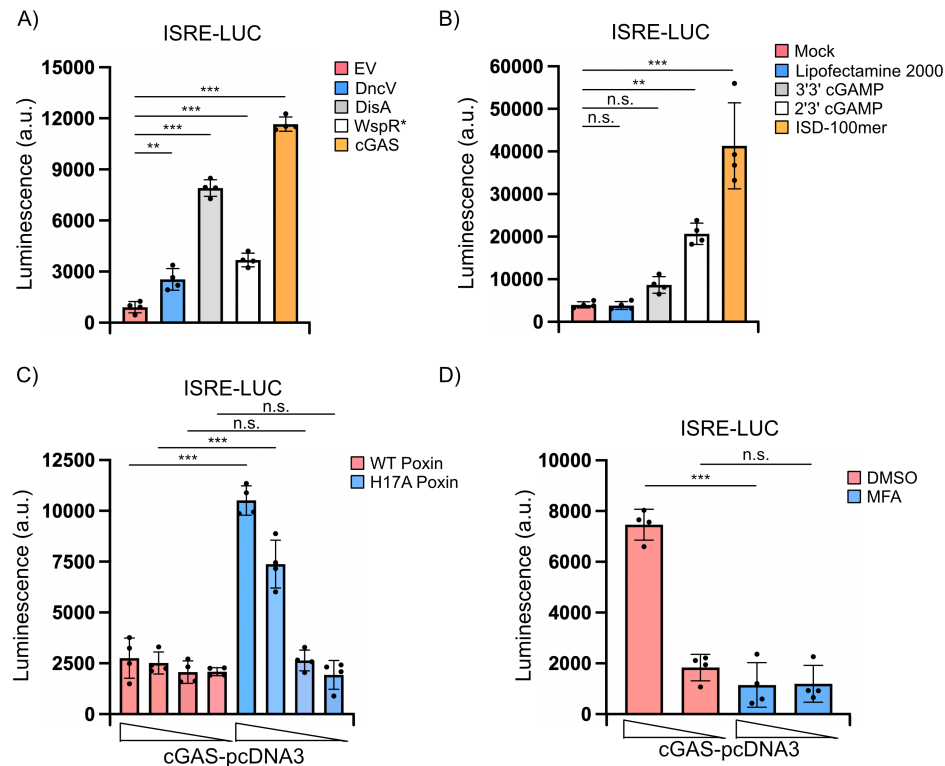

**Figure S2: Cyclic dinucleotides including 2'3' cGAMP are transferred from transfected cells into L929-ISRE-LUC reporter cells by co-culturing via gap junctions.** (A) Co-culture of L929-ISRE-LUC cells with HEK293T cells transfected with pcDNA3 empty vector (EV) or CDN cyclases (n=4). (B) L929-ISRE-LUC cells were mock treated, mock transfected with lipofectamine 2000, or transfected with 50  $\mu$ M 3'3' cGAMP, 50  $\mu$ M 2'3' cGAMP, or 1  $\mu$ g ISD-100mer. Luciferase activity was quantified 18 h later (n=4). (C) Co-culture of L929-ISRE-LUC cells with HEK293T cells transfected with decreasing concentrations of cGAS-pcDNA3 (1000, 100, 10, 0 ng) and 3  $\mu$ g of either wildtype (WT) or catalytically inactive (H17A) Poxin (n=4). (D) Co-culture of L929-ISRE-LUC cells with HEK293T cells transfected with cGAS-pcDNA3 (1000 or 0 ng) in the presence or absence of the gap junction inhibitor meclofenamic acid (MFA) (100  $\mu$ M) (n=4). Statistical significance tests: One-way ANOVA with Tukey test (A-D). Representative assays shown: (A-D) n=2.

A)

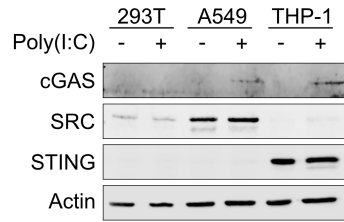

B)

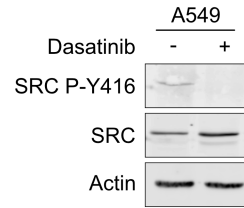

C)

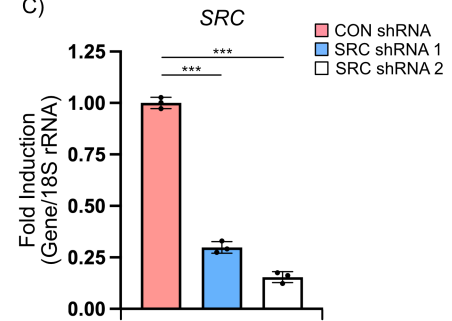

D)

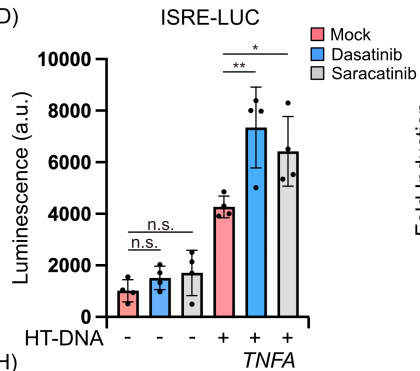

E)

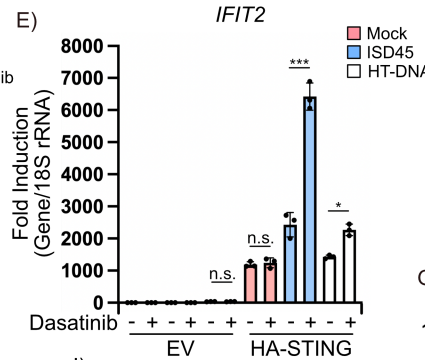

F)

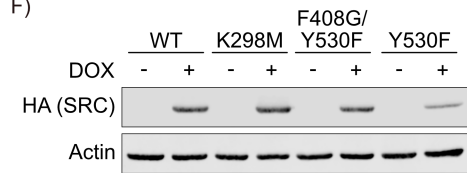

H)

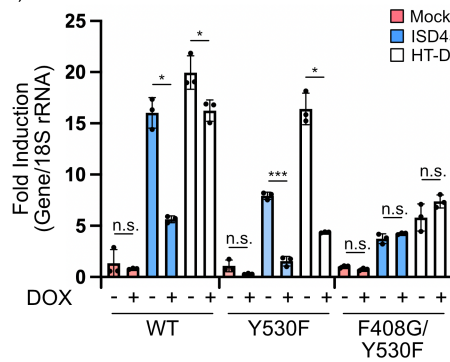

I)

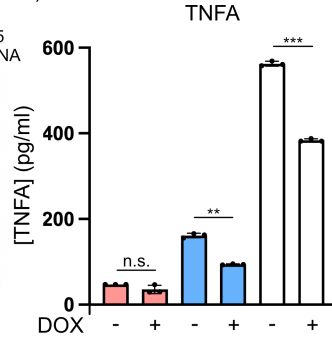

G)

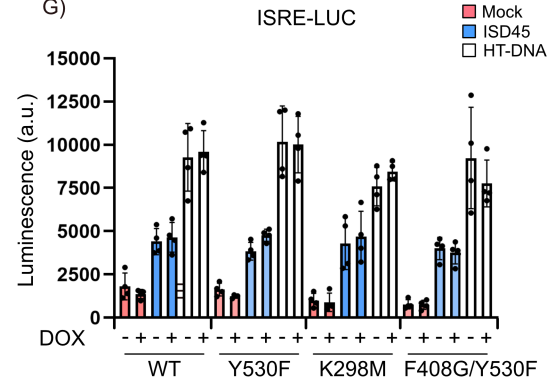

J)

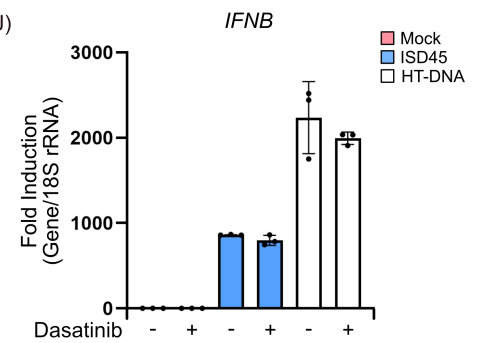



**Figure S3: SRC and cGAS are differentially expressed in various cell lines and impacts whether SRC inhibition or overexpression regulates DNA sensing.** (A) Western blot of indicated cells treated with poly(I:C) for 16 h. (B) Western blot of A549 cells treated with 30 nM dasatinib or vehicle for 48 h. (C) RT-qPCR analysis of *SRC* expression in A549 cells transduced with DOX-inducible non-target (CON) or independent *SRC*-targeting shRNAs. DOX was added for 72 h. *SRC* levels in CON were set to 1 (n=3). (D) Co-culture of L929-ISRE-LUC cells with A549 cells treated with dasatinib (30nM) or saracatinib (80 nM) for 48 h followed by transfection with HT-DNA for 6 h (n=4). (E) RT-qPCR analysis of *IFIT2* levels from A549 cells transfected with EV or HA-STING pcDNA3 and treated with dasatinib for 48 h followed by transfection with indicated DNA ligands for 6 h (n=3). (F) Western blot of A549 WT and mutant HA-SRC-tet-RB SB cells treated with DOX for 48 h. (G) Co-culture of L929-ISRE-LUC cells with cells in (F) followed by transfection with indicated DNA ligands for 6 h (n=4). (H) RT-qPCR analysis of *TNFA* expression in THP-1 WT and mutant HA-SRC-tet-RB SB cells treated with DOX for 48 h followed by transfection with indicated DNA ligands for 6 h (n=3). (I) ELISA of *TNFA* levels from cells in (F). Cells were stimulated with DNA ligands for 24 h (n=3). (J) RT-qPCR analysis of *IFNB* levels from THP-1 cells treated with dasatinib for 48 h followed by transfection with indicated DNA ligands for 6 h (n=3). All RT-qPCR samples were normalized to 18S rRNA, and Actin was used as a Western blot loading control. Statistical significance tests: Student's t test (C, E, G-J); One-way ANOVA with Tukey test (D).. Representative luciferase, qPCR, and ELISA shown: (C-E, H-J) n=2.

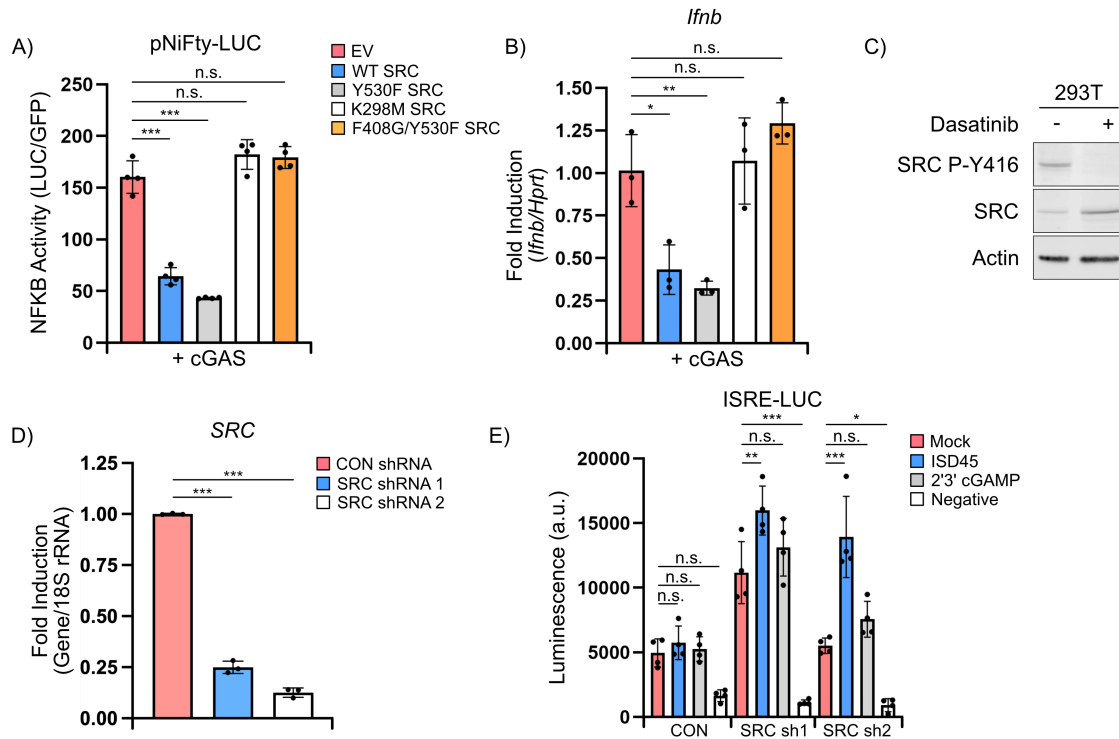

**Figure S4: SRC inhibits cGAS-dependent NFKB activity and SRC depletion enhances a DNA-dependent IFN response.** (A) NFKB luciferase assay from HEK293T cells transfected with pNiFty-LUC, cGAS pcDNA3, and EV or SRC-HA pcDNA3 WT or mutant pcDNA3 for 24 h. NFKB activity was analyzed by luciferase activity and normalized to transfected eGFP plasmid (n=4). (B) RT-qPCR analysis of murine *Ifnb* from co-cultured L929-ISRE-LUC cells in (B) (n=3). (C) Western blot of HEK293T cells treated with 30 nM dasatinib or vehicle for 48 h. (D) RT-qPCR analysis of *SRC* expression in HEK293T cells transduced with DOX-inducible non-target (CON) or independent *SRC*-targeting shRNAs. DOX was added for 72 h. *SRC* levels in CON were set to 1 (n=3). (E) Co-culture of L929-ISRE-LUC cells with cells in (D) transfected with cGAS pcDNA3 for 24 h followed by transfection of ISD45 or 2'3' cGAMP for 6 h. Cells not transfected with cGAS were used as a negative control (Negative) (n=4). All RT-qPCR samples were normalized to 18S rRNA (human) or *Hprt* (murine), and Actin was used as a Western blot loading control. Statistical significance tests: One-way ANOVA with Tukey test (A, B, D, E). Representative luciferase and qPCR shown: (A) n=3 and (B, D, E) n=2.

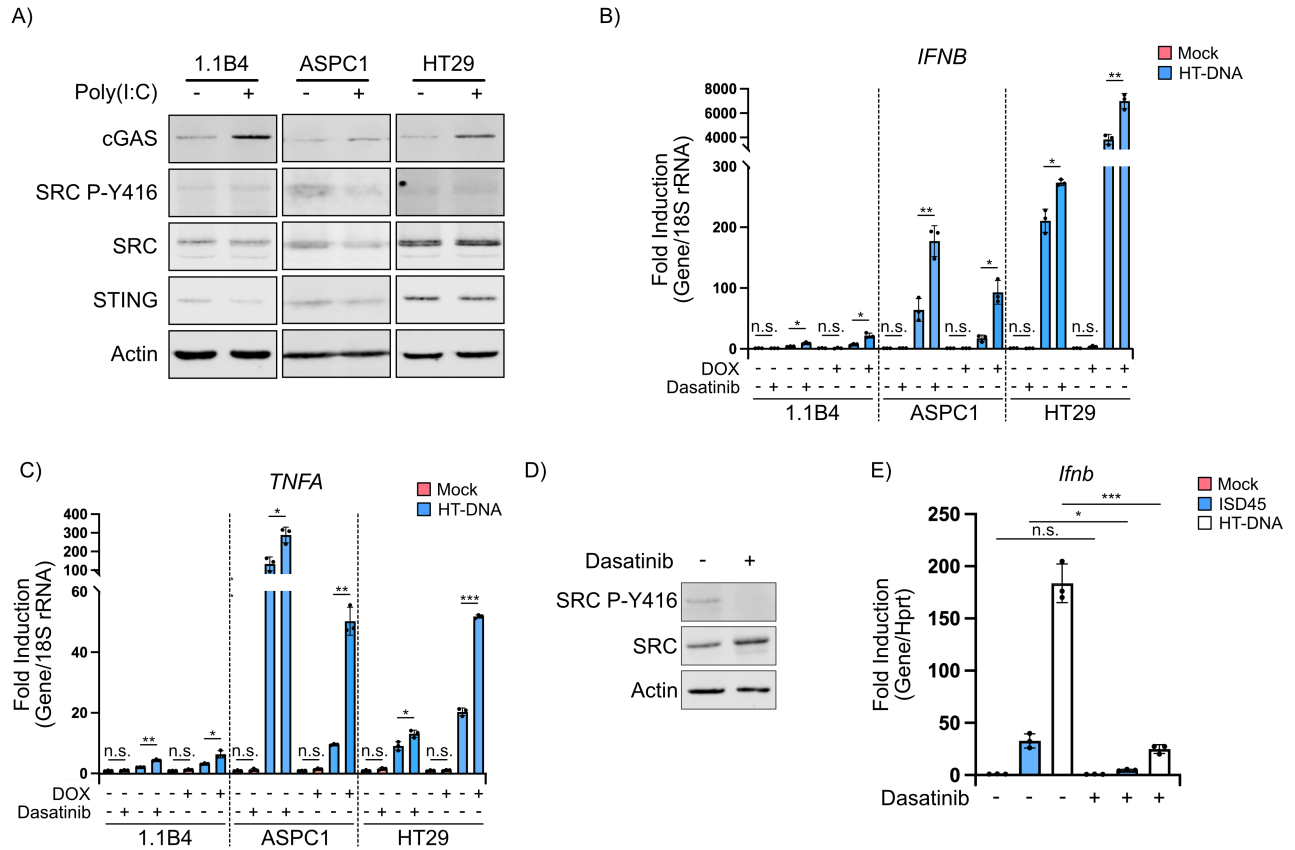

**Figure S5: SRC inhibits DNA sensing in multiple human tumor lines.** (A) Western blot of indicated cell lines treated with 1 µg/ml poly(I:C) for 16 h. (B) RT-qPCR analysis of *IFNB* expression following HT-DNA transfection for 6 h in cell lines in (A) transduced with DOX-inducible SRC-targeting shRNA or treated with 30 nM dasatinib. DOX was added for 72 h and dasatinib for 48 h. *IFNB* levels in Mock treated samples were set to 1 (n=3). (C) RT-qPCR of *TNFA* levels from cells in (B) (n=3). (D) Western blot of murine B16-BL6 cells treated with 100 nM dasatinib or vehicle for 48 h. (E) RT-qPCR analysis of *Ifnb* from cells in (D) treated with ISD45 or HT-DNA for 6 h (n=3). All RT-qPCR samples were normalized to 18S rRNA (human) or *Hprt* (murine), and Actin was used as a Western blot loading control. Statistical significance tests: Student's t test (B, C); One-way ANOVA with Tukey test (E). Representative qPCR shown: (B, C, E) n=2.

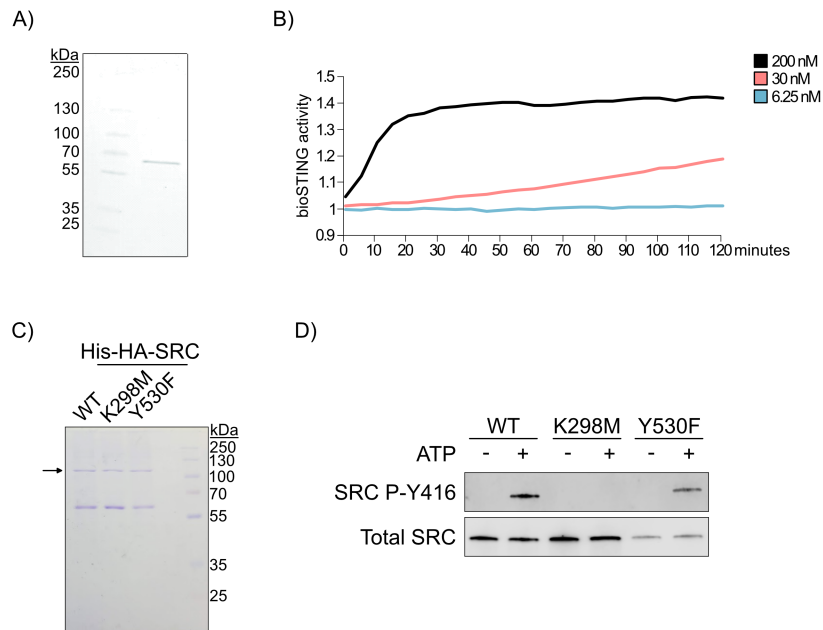

**Figure S6: Human FLAG-cGAS and HA-SRC purification and activity validation.** (A) Coomassie brilliant blue stain of purified FLAG-cGAS after SEC and concentration. (B) BioSTING FRET assay using various concentration of purified FLAG-cGAS for 2 h. (C) Coomassie brilliant blue stain of purified WT and mutant HA-SRC after concentration. Arrow depicts not-specific band. (D) Western blot of purified WT and mutant HA-SRC in vitro kinase assays using cold ATP. SRC Y416 designates autophosphorylation and SRC kinase activity.
